# Supplementary material for: Solar Light-Induced Photocatalytic Response of BiOCl/PANI Composite towards the Degradation of Tetracycline
Source: MDPI journal article supplement (doi:10.3390/catal13050795), 2023-04-24
Supplement: s1 [file s1]

Archive with 1 entries (1 files):
- catalysts-2319027-supplementary.pdf
