# Supplementary material for: Solar Light-Induced Photocatalytic Response of BiOCl/PANI Composite towards the Degradation of Tetracycline
Source: MDPI journal article supplement (doi:10.3390/catal13050795), 2023-04-24
Supplement: s1 [file s1 › catalysts-2319027-supplementary.pdf]

Supporting information

**Solar-light-induced photocatalytic response of BiOCl/PANI composite  
towards the degradation of tetracycline**

Janis Goyal<sup>†</sup>, Surbhi Sharma<sup>†</sup> and Soumen Basu<sup>\*</sup>

*School of Chemistry and Biochemistry, Thapar Institute of Engineering & Technology, Patiala-147004, India.*

*<sup>\*</sup>Corresponding author: E-mail:soumen.basu@thapar.edu*

<sup>†</sup>These authors contributed equally to this work.

**Table S1.** Parameters for Rh-B and TC degradation using different materials.

| Materials        | Rhodamine-B (Rh-B) |                                    | Tetracycline (TC) |                                    |
|------------------|--------------------|------------------------------------|-------------------|------------------------------------|
|                  | % Degradation      | Rate constant (min <sup>-1</sup> ) | % Degradation     | Rate constant (min <sup>-1</sup> ) |
| No catalyst      | 16                 | 0.0015                             | 9                 | 0.0018                             |
| BiOCl            | 60                 | 0.0056                             | 38                | 0.0048                             |
| PANI             | 72                 | 0.0107                             | 52                | 0.0058                             |
| TiO <sub>2</sub> | 44                 | 0.0056                             | 34                | 0.0037                             |
| PB15             | 97                 | 0.0236                             | 77                | 0.0106                             |

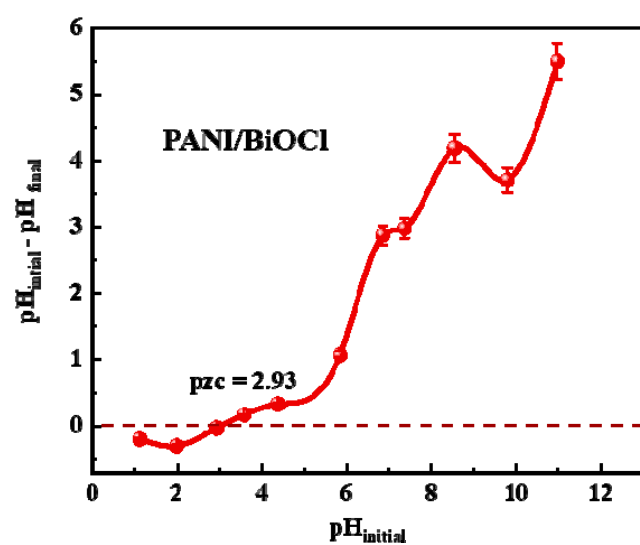

Figure S1. Plot of pzc measurement of Rh-B
